# Supplementary material
Source: Research Square preprint supplement (doi:10.21203/rs.3.rs-8730678/v1)
Supplement: Supplementary file 1 [file 3d6143c58c5d93818a163163.docx]

**Multidimensional Patient Wellbeing Questionnaire**

Please rate each statement using the following **5-point** Likert scale:

1 — Very poor / Strongly disagree
2 — Poor / Disagree
3 — Moderate / Neutral
4 — Good / Agree
5 — Very good / Strongly agree

1. Sex:
   ☐ Male ☐ Female
2. Age group:
   ☐ 18–29 ☐ 30–39 ☐ 40–49 ☐ 50–59 ☐ 60–69 ☐ ≥70
3. Education level:
   ☐ Primary ☐ Secondary ☐ Vocational ☐ Technical ☐ Higher education
4. Social status:
   ☐ Worker ☐ Employee ☐ Business owner ☐ Student ☐ Pensioner ☐ Unemployed ☐ Disabled
5. Marital status:
   ☐ Married ☐ Single ☐ Divorced
6. How would you rate your current health status?
   1 ☐ 2 ☐ 3 ☐ 4 ☐ 5 ☐
7. How would you evaluate accessibility of information about the private clinic?
   1 ☐ 2 ☐ 3 ☐ 4 ☐ 5 ☐
8. How would you evaluate financial accessibility of medical services?
   1 ☐ 2 ☐ 3 ☐ 4 ☐ 5 ☐
9. How satisfied are you with the waiting time to see a physician?
   1 ☐ 2 ☐ 3 ☐ 4 ☐ 5 ☐
10. How would you evaluate the clinic’s medical equipment and infrastructure?
    1 ☐ 2 ☐ 3 ☐ 4 ☐ 5 ☐
11. How sufficient was the time allocated to you by the physician?
    1 ☐ 2 ☐ 3 ☐ 4 ☐ 5 ☐
12. How satisfied are you with the quality of medical services provided?
    1 ☐ 2 ☐ 3 ☐ 4 ☐ 5 ☐
13. How would you rate the overall service level of the clinic?
    1 ☐ 2 ☐ 3 ☐ 4 ☐ 5 ☐
14. What is your level of trust in physicians working in private clinics?
    1 ☐ 2 ☐ 3 ☐ 4 ☐ 5 ☐
15. How likely are you to recommend this clinic to others?
    1 ☐ 2 ☐ 3 ☐ 4 ☐ 5 ☐
16. How likely are you to recommend your physician to others?
    1 ☐ 2 ☐ 3 ☐ 4 ☐ 5 ☐
17. How satisfied are you with the clinic’s management and organizational system?
    1 ☐ 2 ☐ 3 ☐ 4 ☐ 5 ☐
18. How would you evaluate the correspondence between service quality and price?
    1 ☐ 2 ☐ 3 ☐ 4 ☐ 5 ☐
19. How satisfied are you with your frequency of visits to private clinics?
    1 ☐ 2 ☐ 3 ☐ 4 ☐ 5 ☐
20. To what extent did the clinic meet your expectations?
    1 ☐ 2 ☐ 3 ☐ 4 ☐ 5 ☐
21. What is your intention to revisit this clinic?
    1 ☐ 2 ☐ 3 ☐ 4 ☐ 5 ☐
22. How psychologically comfortable did you feel in the clinic?
    1 ☐ 2 ☐ 3 ☐ 4 ☐ 5 ☐
23. To what extent did medical services reduce your health-related anxiety?
    1 ☐ 2 ☐ 3 ☐ 4 ☐ 5 ☐
24. How would you evaluate the emotional support provided by medical staff?
    1 ☐ 2 ☐ 3 ☐ 4 ☐ 5 ☐
25. How clearly did the physician explain your medical condition?
    1 ☐ 2 ☐ 3 ☐ 4 ☐ 5 ☐
26. How well did you understand the treatment plan?
    1 ☐ 2 ☐ 3 ☐ 4 ☐ 5 ☐
27. How would you evaluate your ability to ask questions freely?
    1 ☐ 2 ☐ 3 ☐ 4 ☐ 5 ☐
28. How respectfully and with dignity were you treated?
    1 ☐ 2 ☐ 3 ☐ 4 ☐ 5 ☐
29. To what extent did you feel free from discrimination?
    1 ☐ 2 ☐ 3 ☐ 4 ☐ 5 ☐
30. How confident are you in the medical safety of services provided?
    1 ☐ 2 ☐ 3 ☐ 4 ☐ 5 ☐
31. How would you evaluate hygiene and infection control standards?
    1 ☐ 2 ☐ 3 ☐ 4 ☐ 5 ☐
32. How willing are you to return to the same physician?
    1 ☐ 2 ☐ 3 ☐ 4 ☐ 5 ☐
33. How would you evaluate follow-up care and post-treatment guidance?
    1 ☐ 2 ☐ 3 ☐ 4 ☐ 5 ☐
34. What would you like to change in the performance of medical staff?
    ..........................................................................................................................................................................................................................................................................................................................
35. What are your suggestions for improving services in private healthcare institutions?
    ..........................................................................................................................................................................................................................................................................................................................

Thank you for your participation.
